# Supplementary material for: Sol–gel synthesis of Eu3+ doped silica-gold nanorod composites with tunable optical properties
Source: Royal Society of Chemistry journal article supplement (doi:10.1039/d3ra04652d), 2023-01-01
Supplement: d3ra04652d1.pdf [file d3ra04652d1.pdf]

## **Electronic Supplementary Information**

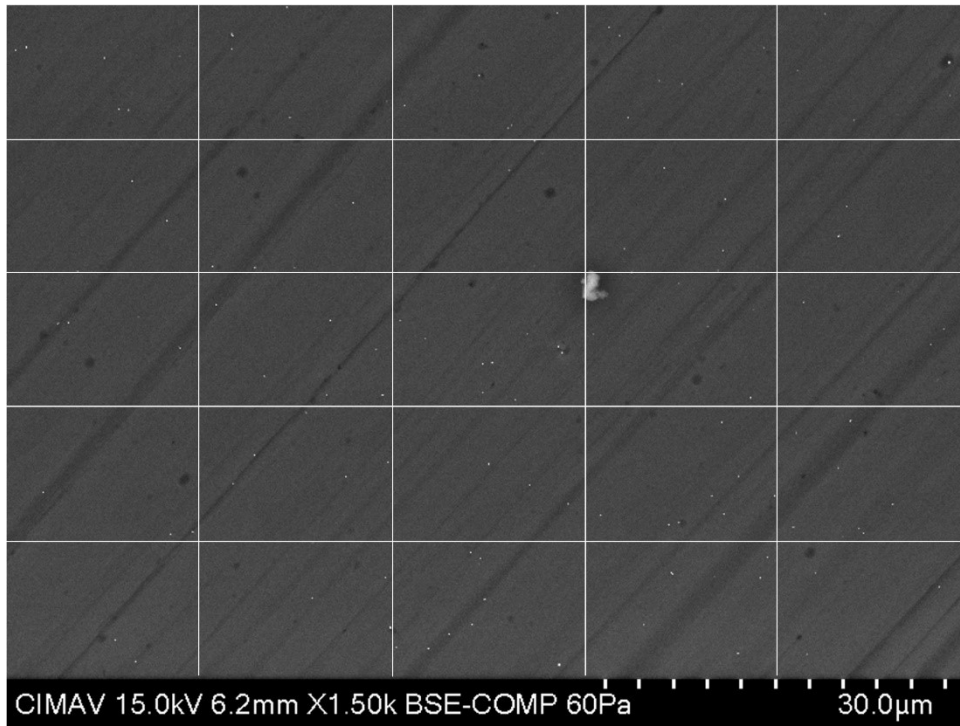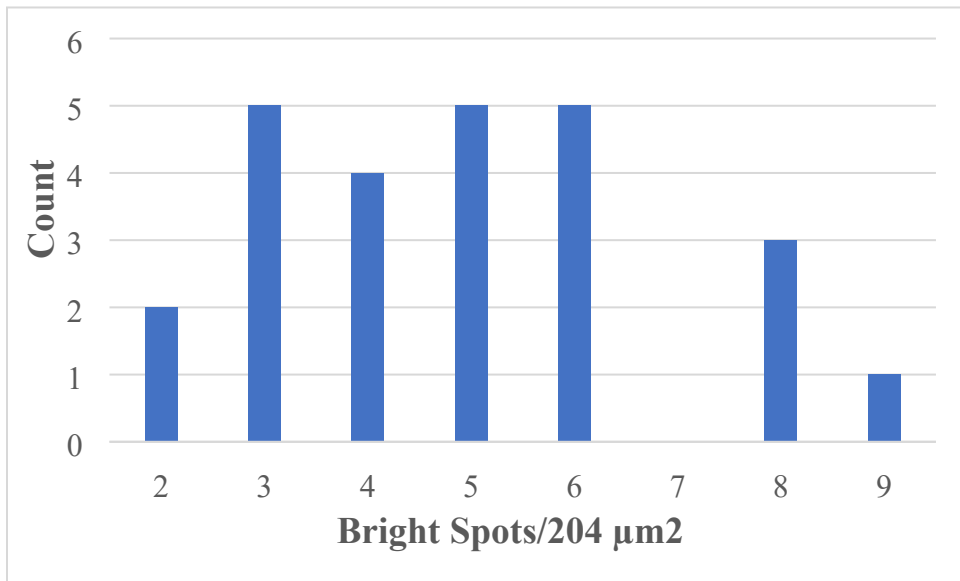

**Fig. S1.** Analysis of AuNRs randomly distributed in a5 sample.

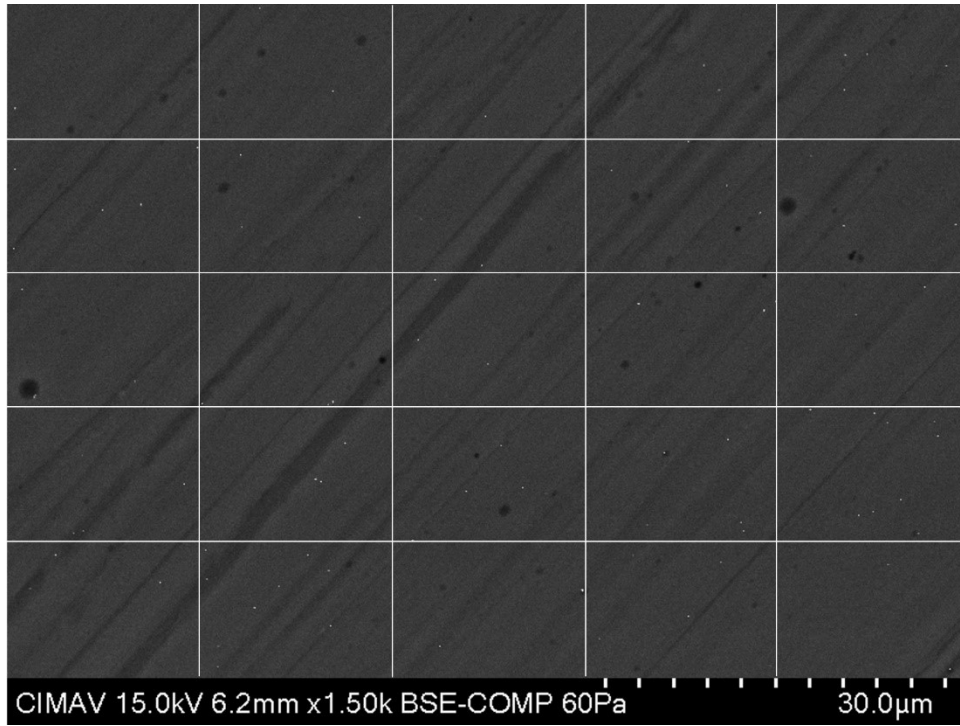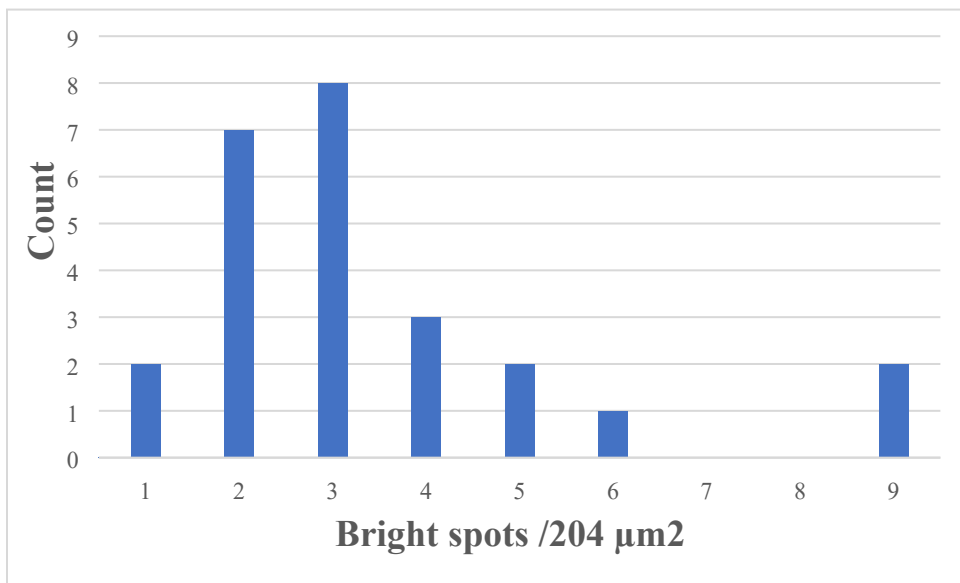

Fig. S2. Analysis of AuNRs randomly distributed in a4 sample.

# **Electron Microscopy Images**

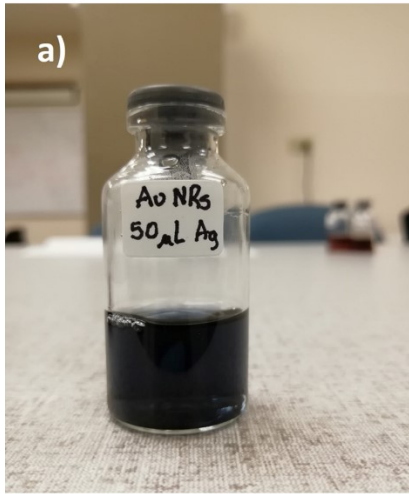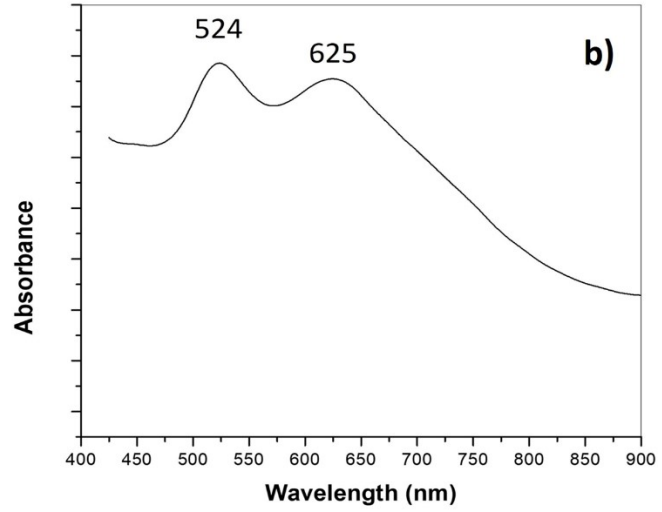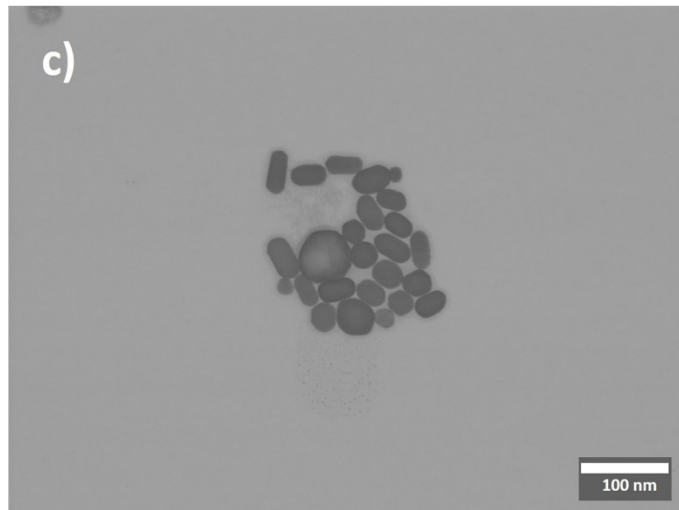

**Fig. S3** Gold nanorods (AuNRs) obtained by the seeding method [18]. a) AuNRs suspension; b) absorption spectrum and c) STEM image.

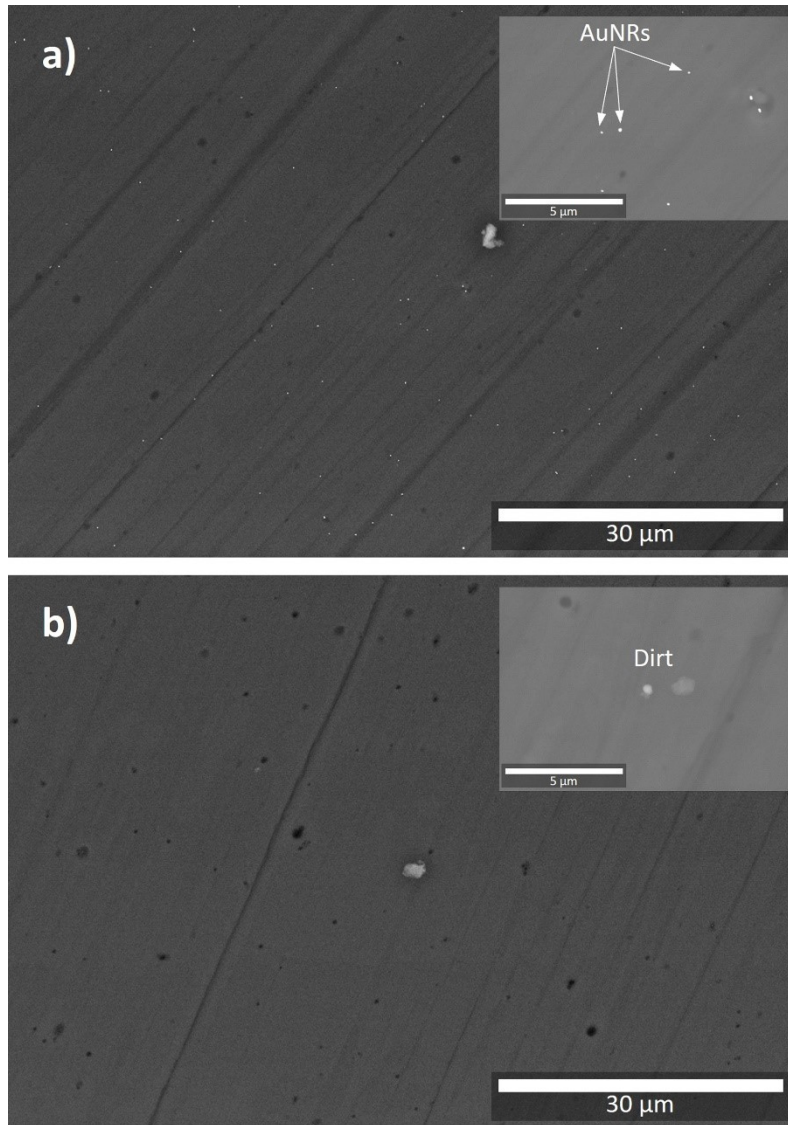

**Fig. S4** BSE images of: a) **a5** sample; b) **b5** sample. Insets correspond to samples observed at higher magnifications.

a)

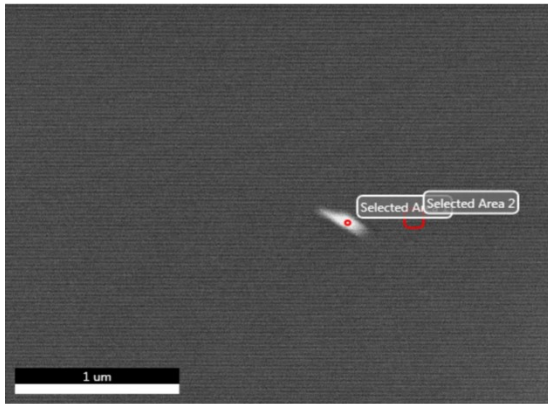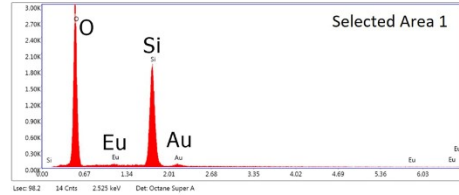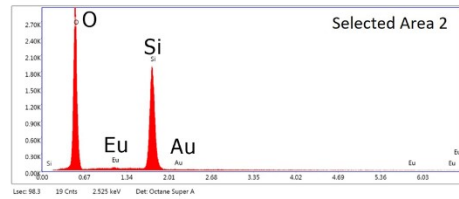

b)

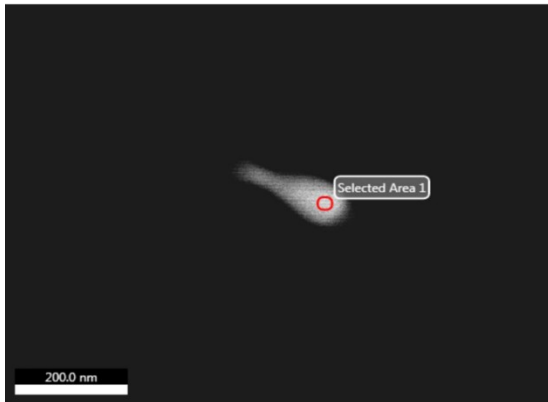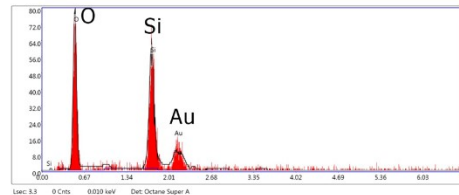

**Fig. S5** EDS analysis carried out on (a5) sample. In a) the individual EDS analysis marked as Selected Area 1 over AuNRs and Selected Area 2 on the surface of the silica matrix correspond with the spectra to the left. In b) EDS analysis was carried out at higher magnifications to improve local chemical analysis.
