# Supplementary material for: Sol–gel synthesis of Eu3+ doped silica-gold nanorod composites with tunable optical properties
Source: Royal Society of Chemistry journal article supplement (doi:10.1039/d3ra04652d), 2023-01-01

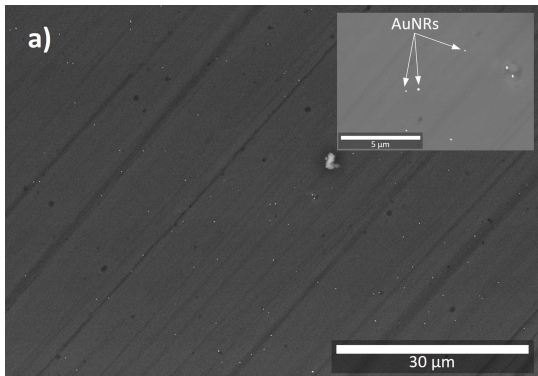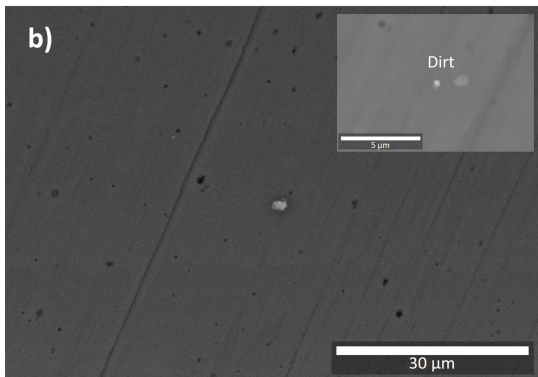

Supplement: d3ra04652d4.pdf [file d3ra04652d4.pdf]
